# Supplementary material for: A novel pH-responsive POSS-based nanoporous luminescent material derived from brominated distyrylpyridine and octavinylsilsesquioxane
Source: Royal Society of Chemistry journal article supplement (doi:10.1039/c4ra13628d), 2015-01-01
Supplement: c4ra13628d1.pdf [file c4ra13628d1.pdf]

# Supporting Information

## **A Novel pH-Responsive POSS-Based Nanoporous Luminescent Material Derived from Brominated Distyrylpyrdine and Octavinylsilsesquioxane**

Wenyan Yang,<sup>a</sup> Xuesong Jiang,<sup>\*b</sup> Hongzhi Liu<sup>\*a,c</sup>

<sup>a</sup> Key Laboratory of Special Functional Aggregated Materials, Ministry of Education, School of Chemistry and Chemical Engineering, Shandong University, Jinan 250100, P. R. China. Fax: (+86)531 88364691. E-mail: liuhongzhi@sdu.edu.cn.

<sup>b</sup> School of Chemistry and Chemical Engineering, Shanghai Jiao Tong University, 800 Dongchuan Road, Shanghai, 200240, China.

<sup>c</sup> Key Laboratory of Specially Functional Polymeric Materials and Related Technology, Ministry of Education, East China University of Science and Technology, Shanghai, 200237.

## Synthesis and characterization of Br–DSP

As shown in Scheme 1, Br–DSP was synthesized through one–step reaction according to our previous report.<sup>1</sup> A mixture of 4–bromobenzaldehyde (0.1 mol), cyclopentanone (0.05 mol) and ammonium acetate (38.5 g, 0.5 mol) in ethanol (250 mL) with 1 mL of 30 % hydrogen peroxide was boiled during 1 h and left to stand overnight at 20 °C. The precipitate was refluxed in 50 mL acetone, and then filtered to get product, which is dried in vacuum at 80 °C for 24 h.

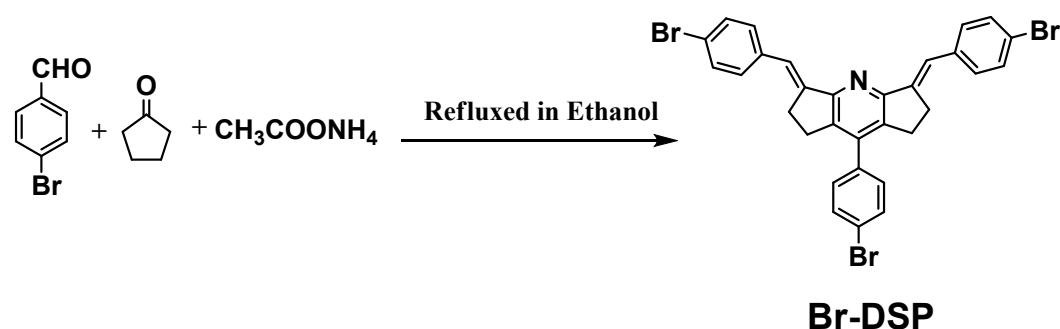

**Scheme 1S.** Synthesis of Br–DSP.

## Reference

- (1) X. Jiang, J. Yin, Y. Murakami and M. Kaji, *J. Photopolym. Sci. Technol.*, 2009, **22**, 351.

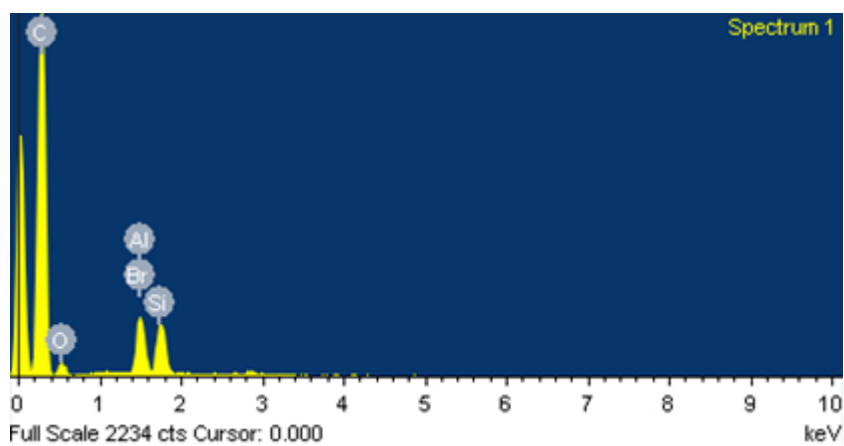

| Element | Weight% | Atomic% |
|---------|---------|---------|
| C       | 82.80   | 89.50   |
| O       | 8.73    | 7.09    |
| Al      | 2.80    | 1.35    |
| Si      | 3.83    | 1.77    |
| Br      | 1.84    | 0.30    |
| Totals  | 100.00  |         |

| Element | Weight% | Atomic% |
|---------|---------|---------|
| C       | 85.19   | 90.72   |
| O       | 8.98    | 7.19    |
| Si      | 3.94    | 1.79    |
| Br      | 1.89    | 0.30    |
| Totals  | 100.00  |         |

**Figure 1S.** Energy dispersive spectroscopy (EDS) of HPP.

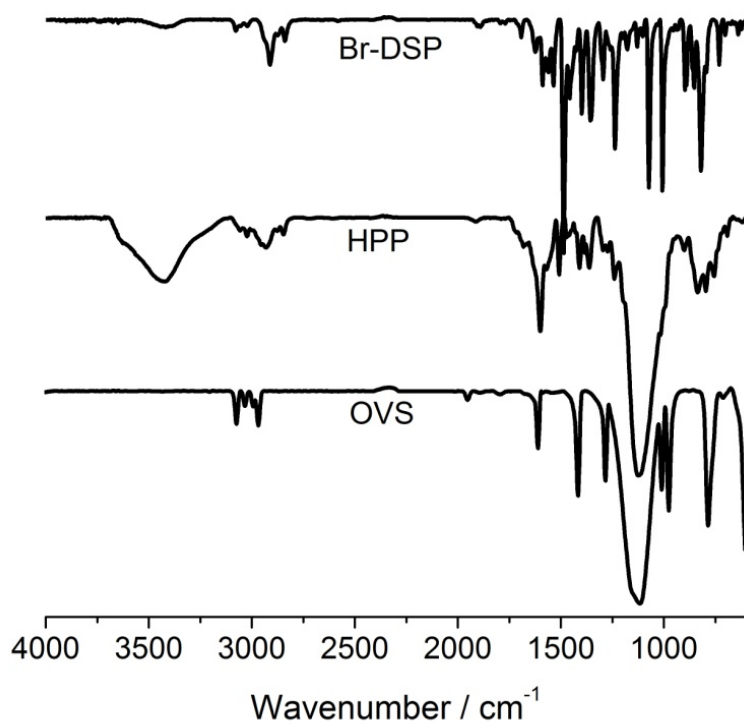

**Figure 2S.** FTIR spectra of OVS, Br-DSP and HPP.

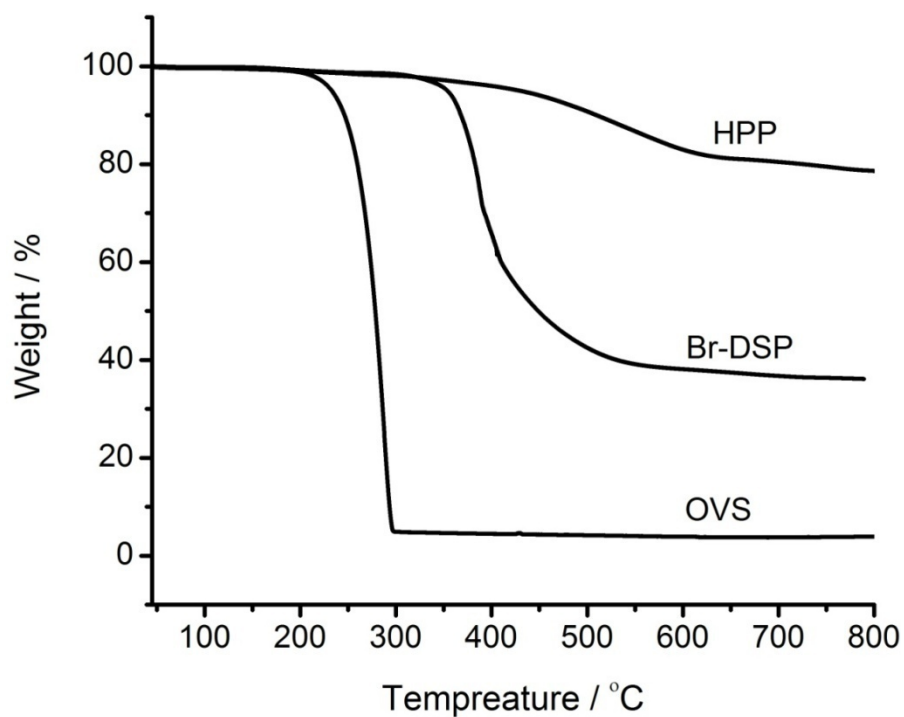

**Figure 3S.** TGA curves of OVS, Br-DSP and HPP.

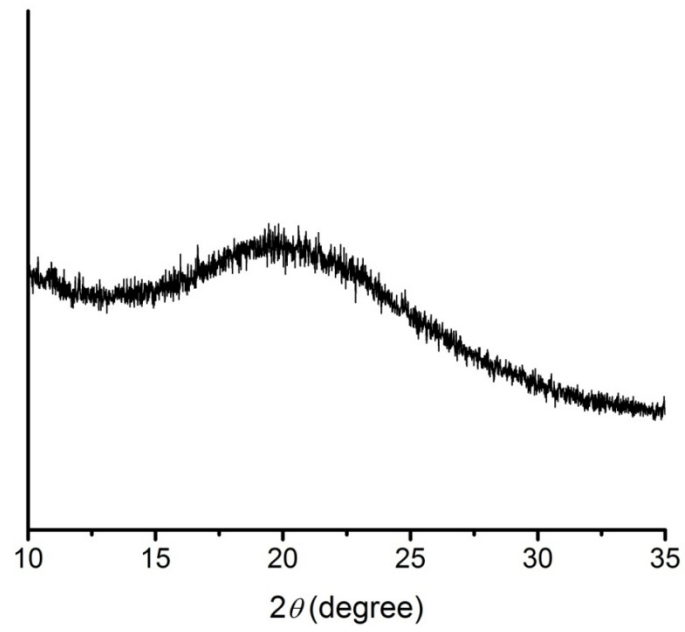

**Figure 4S.** PXRD pattern of HPP.

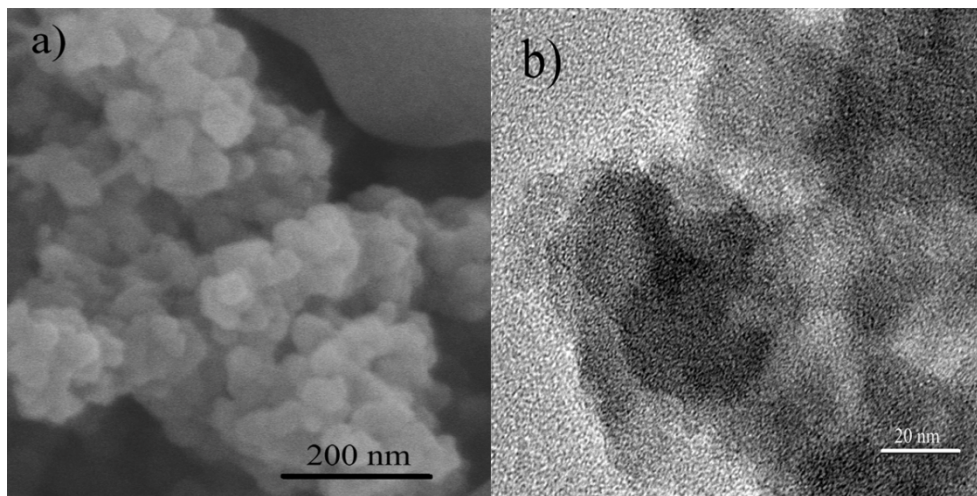

**Figure 5S.** a) FE-SEM image of HPP and b) HR-TEM image of HPP.

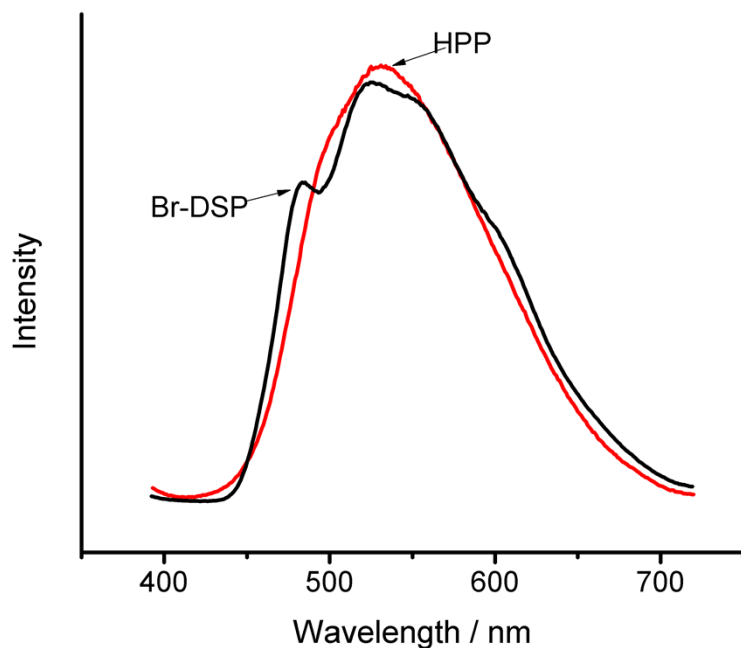

**Figure 6S.** Fluorescence spectra of HPP and Br–DSP in the solid state (excited at 370 nm).

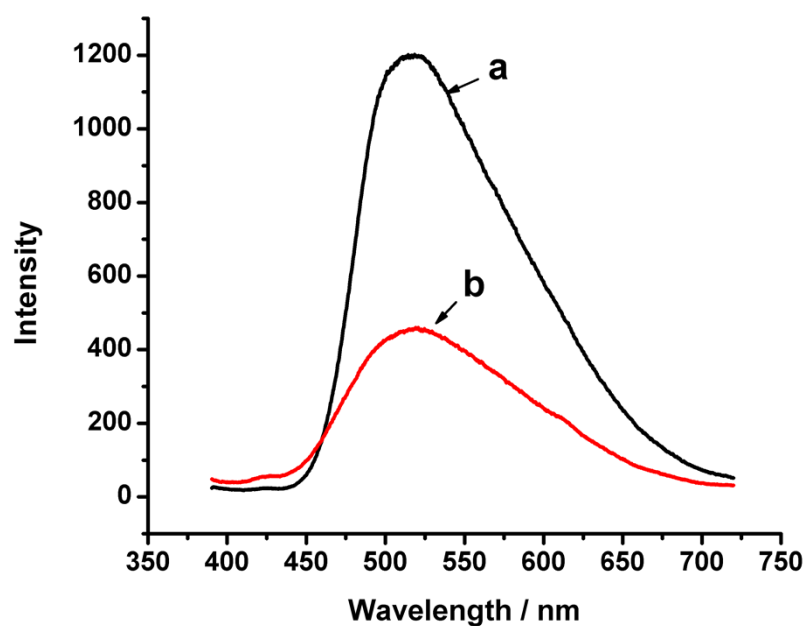

**Figure 7S.** Fluorescence spectra for the suspensions of HPP in buffer solutions with the pH = 7.00, **a** curve was before irradiated under ultraviolet light; **b** curve was after irradiated under continuous ultraviolet light for 2 h.

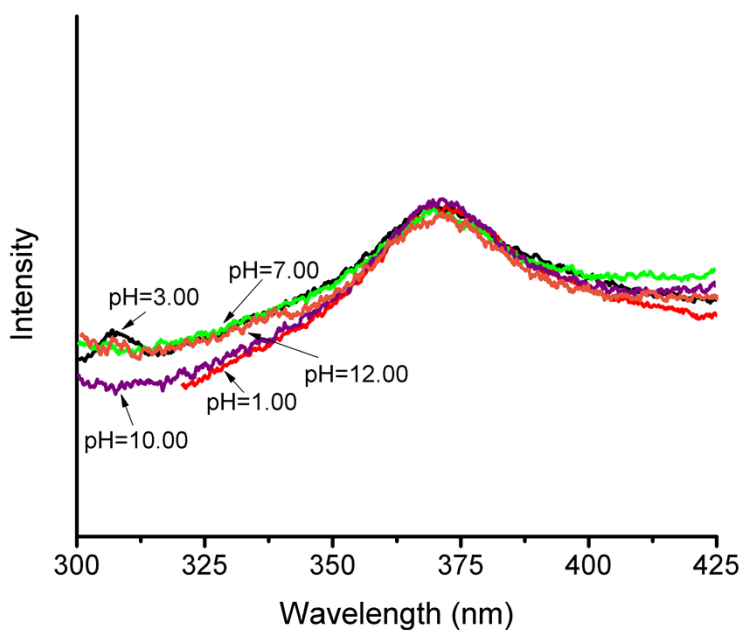

**Figure 8S.** Fluorescence excitation spectra of suspensions of HPP in buffer solutions with different pH values.

**Table 1S.** The  $\lambda_{em}$  at different pH values of suspensions of HPP.

| pH   | $\lambda_{em}$ /nm | pH    | $\lambda_{em}$ /nm |
|------|--------------------|-------|--------------------|
| 1.00 | 618                | 4.50  | 561                |
| 1.50 | 614                | 5.00  | 530                |
| 2.00 | 608                | 5.50  | 525                |
| 2.50 | 600                | 6.00  | 525                |
| 3.00 | 593                | 6.50  | 524                |
| 3.50 | 587                | 7.00  | 524                |
| 4.00 | 575                | 12.00 | 524                |

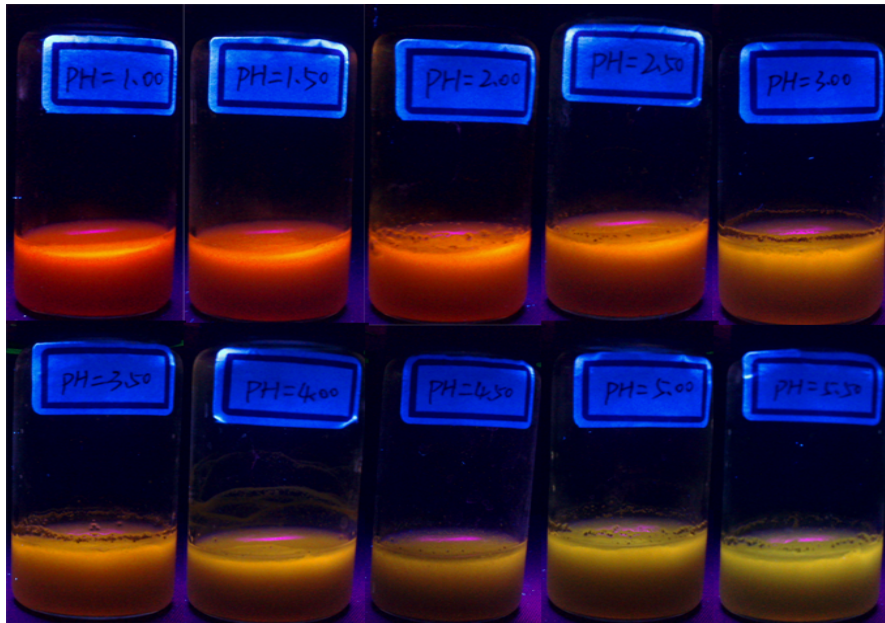

**Figure 9S.** Photos of suspensions of HPP in buffer solutions with the pH values in the range from 1.00 to 5.50 under UV light (365 nm) illumination.

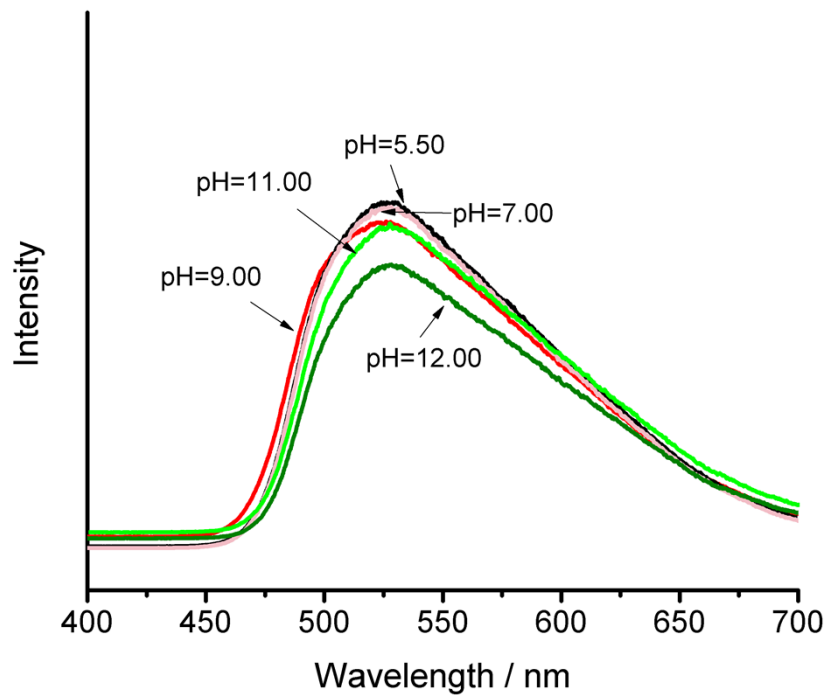

**Figure 10S.** Fluorescence spectra of suspensions of HPP in buffer solutions with the pH values in the range from 5.50 to 12.00 (excited at 370 nm).



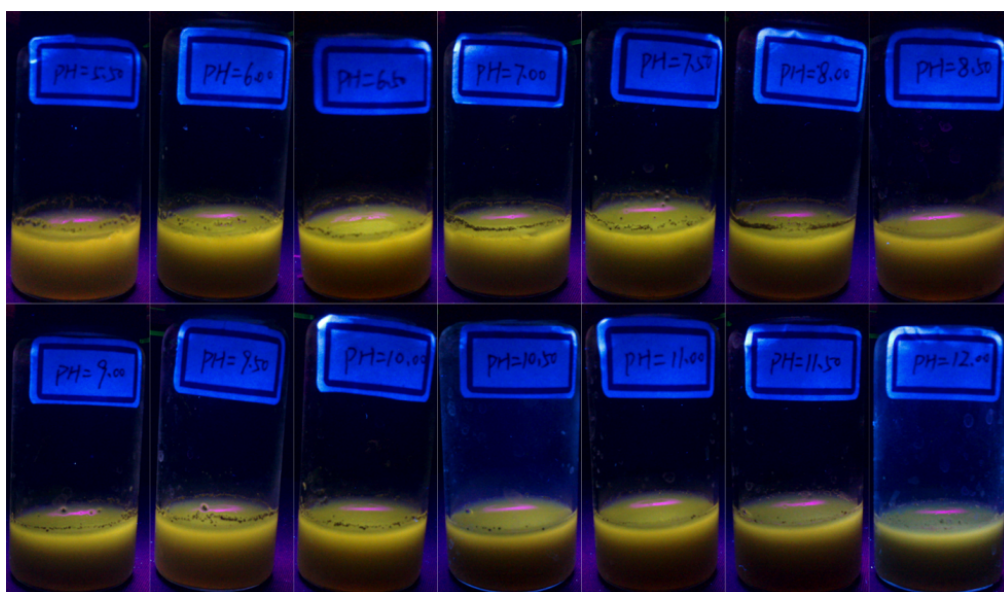

**Figure 11S.** Photos of suspensions of HPP in buffer solutions with the pH values in the range from 5.50 to 12.00 under UV light (365 nm) illumination.

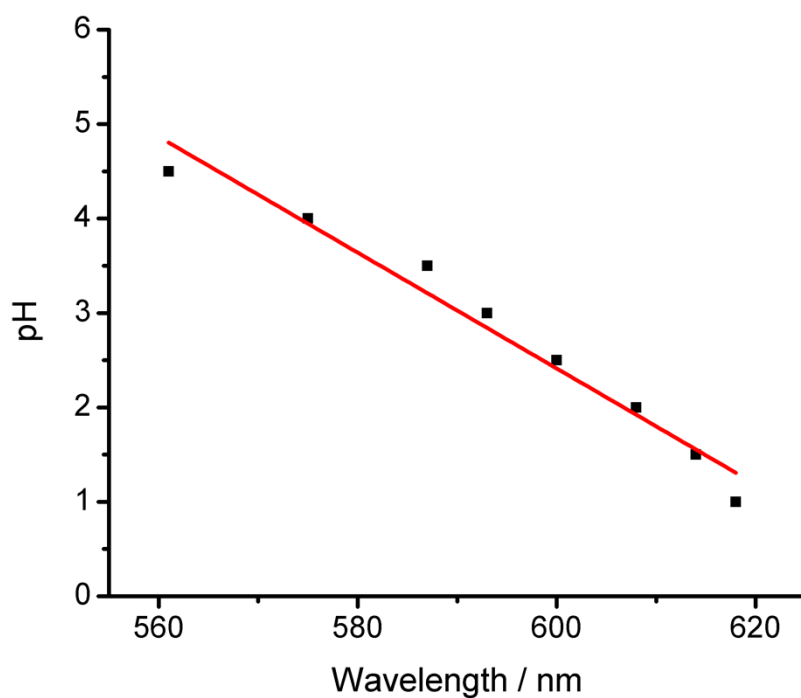

**Figure 12S.** Plots of the fluorescence maximum emission wavelength of HPP versus pH values with a formula of  $\text{pH} = -0.061 \lambda_{\text{em}} + 39$  ( $\text{pH} = 1.00\text{--}4.50$ ).

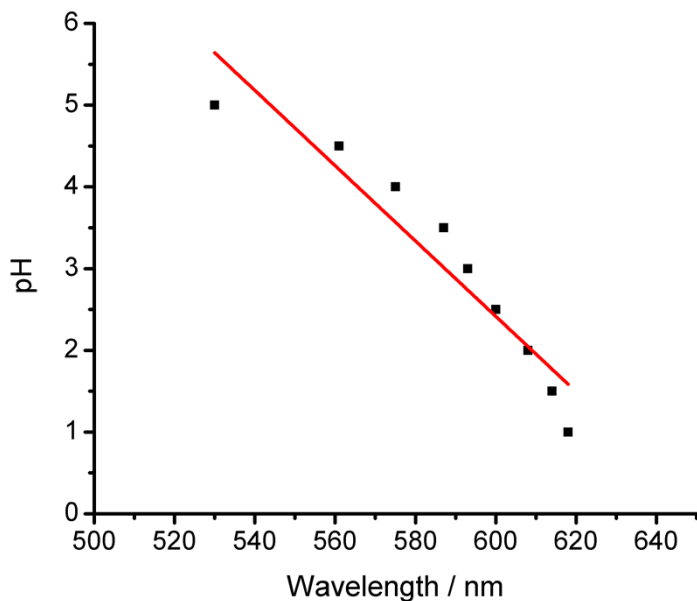

**Figure 13S.** Plots of the fluorescence maximum emission wavelength of HPP versus pH values with a formula of  $\text{pH} = -0.046 \lambda_{\text{em}} + 30$  (pH = 1.00–5.00).

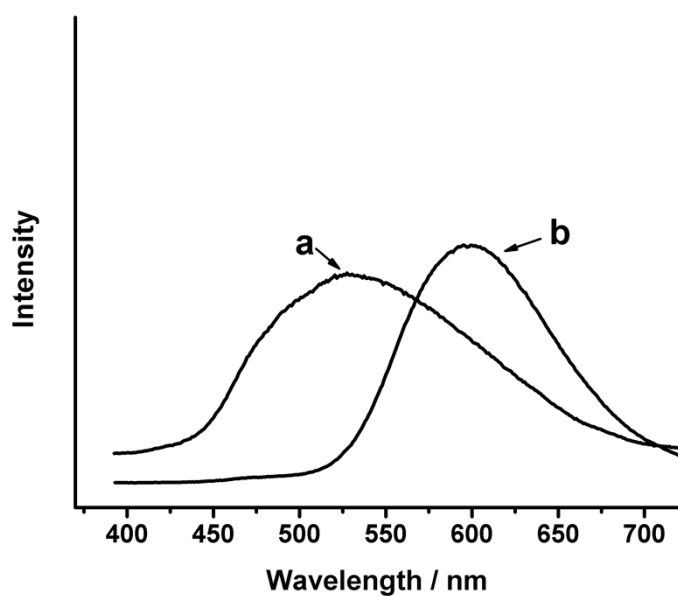

**Figure 14S.** Fluorescence spectra of suspensions of HPP in buffer solutions. **a** curve was the buffer solution of pH = 1 was replaced by the buffer solution of pH = 12; **b** curve was the buffer solution of pH = 12 was replaced by the buffer solution of pH = 1 again.

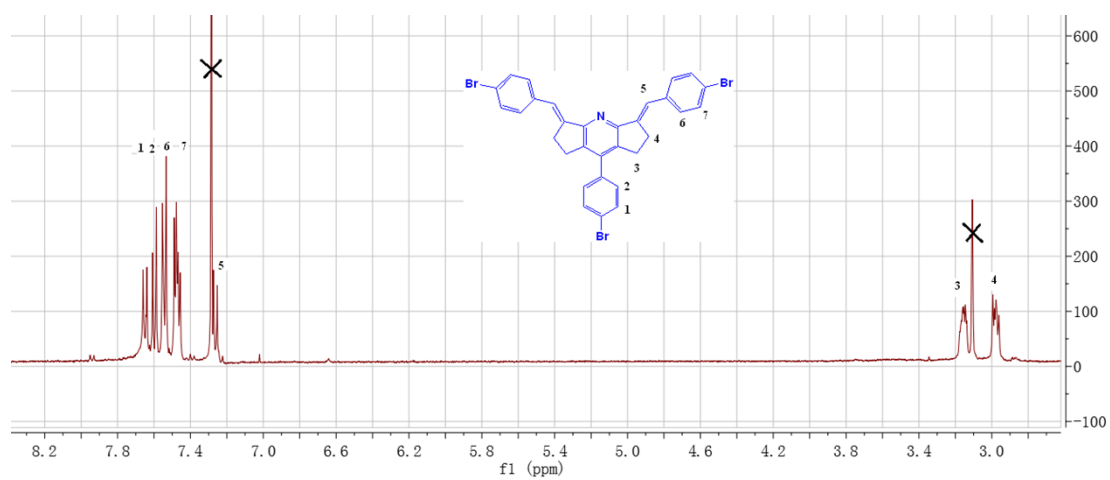

**Figure 15S.**  $^1\text{H}$  NMR of Br-DSP in  $\text{CDCl}_3$ .

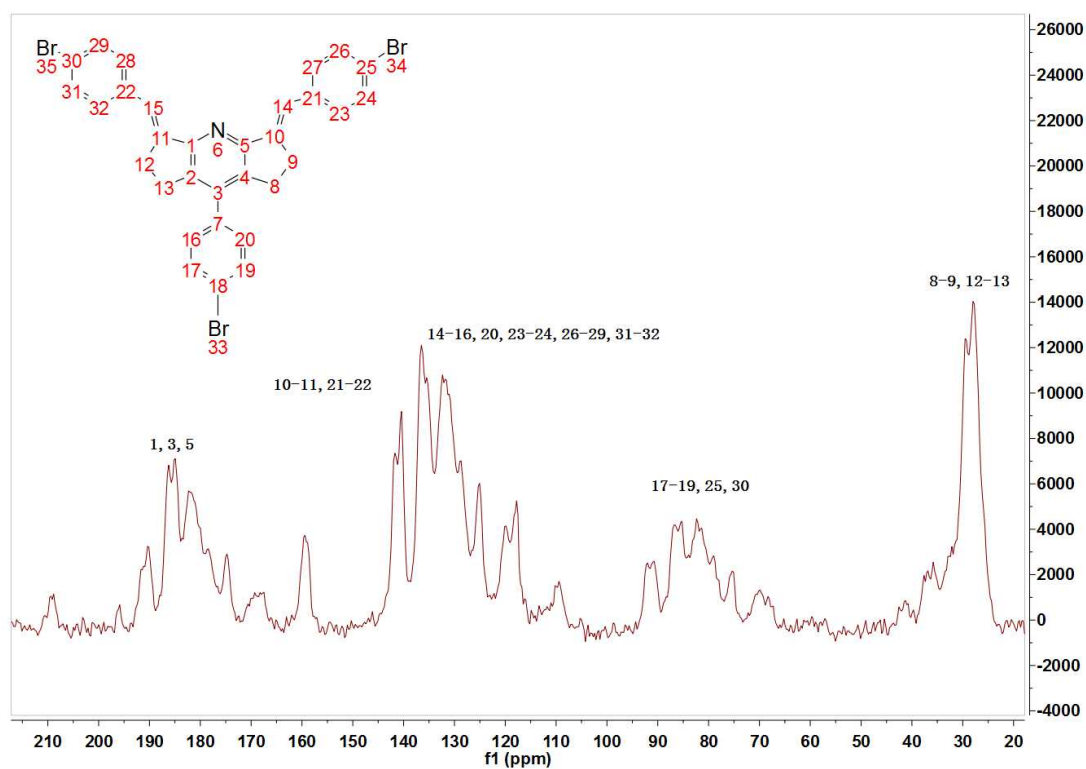

**Figure 16S.** Solid-state  $^{13}\text{C}$  CP/MAS NMR spectrum of Br-DSP.

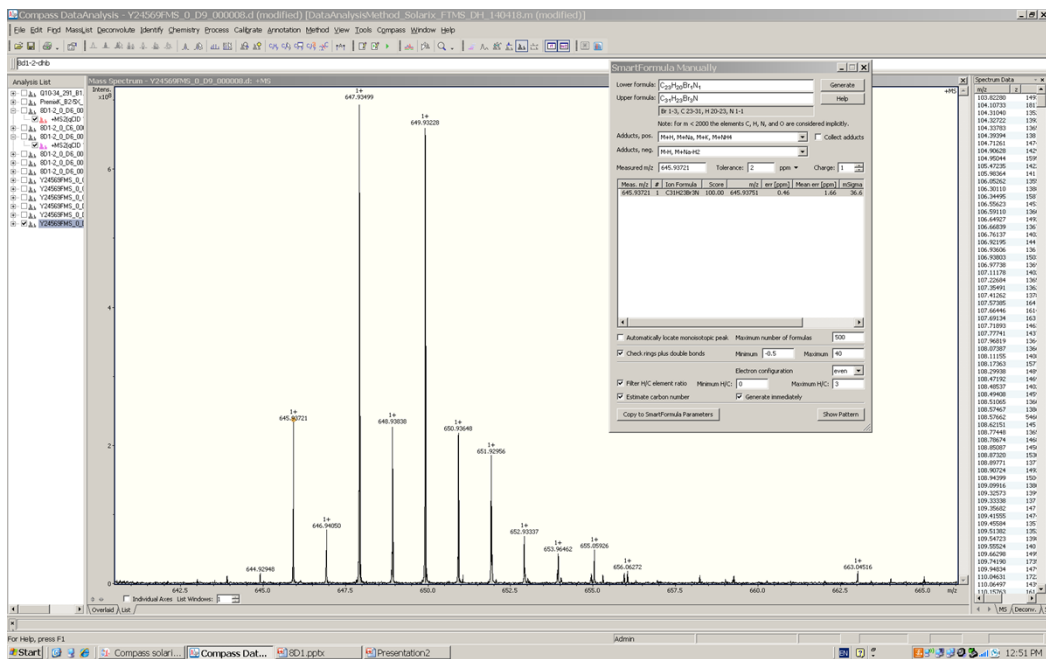

Figure 17S. Mass spectrum of Br-DSP.
